# Supplementary material for: A binuclear Mn(ii) complex as an efficient catalyst for transamidation of carboxamides with amines
Source: Royal Society of Chemistry journal article supplement (doi:10.1039/c3ra45176c), 2013-11-12
Supplement: c3ra45176c.pdf [file c3ra45176c.pdf]

## ***Electronic Supplementary Information***

# **A binuclear Mn(II) complex as an efficient catalyst for transamidation of carboxamides with amines**

**Divya Pratap Singh, Bharat Kumar Allam, Krishna Nand Singh and  
Vinod Prasad Singh\***

**Department of Chemistry (Centre of Advanced Study),  
Faculty of Science, Banaras Hindu University, Varanasi 221005,  
India**

**\*E mail: [singvp@yahoo.co.in](mailto:singvp@yahoo.co.in)**

## Table of Contents

---

|     |                                                              |                  |
|-----|--------------------------------------------------------------|------------------|
| 1.  | General information                                          | S <sub>3</sub>   |
| 2.  | Reagents                                                     | S <sub>3</sub>   |
| 3.  | Synthesis and characterization of ligand H <sub>2</sub> bpoh | S <sub>3-4</sub> |
| 4.  | Crystal structure of ligand H <sub>2</sub> bpoh              | S <sub>4-5</sub> |
| 5.  | Synthesis and characterization of Mn(II) complex             | S <sub>5</sub>   |
| 6.  | Packing of Mn(II) complex                                    | S <sub>6</sub>   |
| 7.  | Inter- and intra-molecular H-bonding in Mn(II) complex       | S <sub>6</sub>   |
| 8.  | Crystallographic data for ligand and Mn(II) complex          | S <sub>7-9</sub> |
| 9.  | Catalytic activity test                                      | S <sub>10</sub>  |
| 10. | References                                                   | S <sub>10</sub>  |
| 11. | <sup>1</sup> H and <sup>13</sup> C spectra of ligand         | S <sub>11</sub>  |

---

## 1. General information

Infrared spectra were recorded in KBr on a Varian 3100 FT-IR spectrophotometer in 4000-400  $\text{cm}^{-1}$  region. An electronic spectrum of the complex was recorded on a Shimadzu spectrophotometer model Pharmaspec UV-1700 in nujol. The C, H and N contents were determined on an Exeter Analytical Inc. CHN Analyzer (Model CE-440). Magnetic susceptibility measurement was performed at room temperature on a Faraday balance using  $\text{Hg}[\text{Co}(\text{SCN})_4]$  as the calibrant and corrected for diamagnetism.<sup>1</sup> All the transamidation experiments were carried out under open atmosphere by using standard Schlenk technique. Column chromatography was carried out employing Merck silica gel (100-120 mesh). Pre-coated Merck GF<sub>254</sub> plates (thickness 0.25 mm) were used for thin-layer analytical chromatography. Visualization of spots on TLC plate was accomplished with UV light and by staining in iodine chamber. <sup>1</sup>H and <sup>13</sup>C NMR were recorded on JEOL AL300 FT-NMR spectrometer. <sup>1</sup>H frequency is at 300.40 MHz and <sup>13</sup>C frequency is at 75.45 MHz. <sup>1</sup>H and <sup>13</sup>C chemical shifts are reported in ppm downfield of tetramethylsilane and referenced to residual solvent peak as follows: DMSO-*d*<sub>6</sub> = 2.50 (<sup>1</sup>H NMR); DMSO-*d*<sub>6</sub> = 39.50 (<sup>13</sup>C NMR). Product yields refer to isolated yields after column chromatography.

Single crystal X-ray diffraction data of ligand H<sub>2</sub>bpoh and the complex  $[\text{Mn}(\text{Hbpoh})(\text{OAc})(\text{H}_2\text{O})]_2 \cdot 6\text{H}_2\text{O}$  were obtained at 295(2) K, on a Oxford Diffraction Gemini diffractometer equipped with CrysAlis Pro., using a graphite mono-chromated Mo-K $\alpha$  ( $\lambda = 0.71073 \text{ \AA}$ ) radiation source. The structures were solved by direct methods (SHELXL-97) and refined against all data by full matrix least-square on  $F^2$  using anisotropic displacement parameters for all non-hydrogen atoms. All hydrogen atoms were included in the refinement at geometrically ideal position and refined with a riding model.<sup>2,3</sup> The MERCURY package and ORTEP-3 for Windows program were used for generating structures.<sup>4,5</sup>

## 2. Reagents

All the chemicals are of analytical grade and were purchased from various commercial sources and used without further purification. 2-bezoylpyridine and oxalic acid dihydrazide were obtained from Sigma-Aldrich, USA;  $\text{MnCl}_2 \cdot 4\text{H}_2\text{O}$ ,  $\text{Mn}(\text{OAc})_2 \cdot 4\text{H}_2\text{O}$ ,  $\text{MnO}_2$ ,  $\text{Mn}(\text{NO}_3)_2 \cdot 4\text{H}_2\text{O}$  and solvents were obtained from Merck Chemicals, India.

## 3. Synthesis and characterization of ligand H<sub>2</sub>bpoh

### (a) Procedure for synthesis of H<sub>2</sub>bpoh

The ligand, (N'1E,N'2E)-N'1,N'2-bis(phenyl (pyridin-2-yl)methylene)oxalohydrazide (H<sub>2</sub>bpoh) was prepared by reacting 50 mL aqueous solution of oxalic acid dihydrazide (5 mmol, 0.59 g) with 25 mL methanolic solution of 2-bezoylpyridine (10 mmol, 1.83 g) in 1:2 molar ratio in a round bottom flask. The reaction mixture was

refluxed continuously for 20 h. A white solid product was obtained on cooling the above solution at room temperature. The product was filtered on a Buckner funnel through suction and purified by washing several times with water followed by methanol to remove the unreacted components. The pure compound was dried in a desiccator over anhydrous  $\text{CaCl}_2$  at room temperature. Single crystal of the ligand  $\text{H}_2\text{bpoh}$  was obtained from a mixture of dichloromethane and DMSO solution by slow evaporation at room temperature.

**(b) Characterization data of  $\text{H}_2\text{bpoh}$**  Yield (80%), m. p. 292 °C. *Anal.* Calc. for  $\text{C}_{26}\text{H}_{20}\text{N}_6\text{O}_2$  (448.48): C, 69.63; H, 4.49; N, 18.74. Found: C, 69.55; H, 4.47; N, 18.71%. IR ( $\nu \text{ cm}^{-1}$ , KBr):  $\nu(\text{NH})$  3387(b);  $\nu(\text{C=O})$  1690(s);  $\nu(\text{C=N})$  1582(m);  $\nu(\text{N-N})$  994(w).  $^1\text{H}$  NMR ( $\text{DMSO-}d_6$ ;  $\delta$  ppm): 14.08<sup>#</sup> (br s, 2H, NH, Z), 10.28 (br s, 2H, NH, E); 8.89–7.39 (m, 18H, Ar-H).  $^{13}\text{C}$  NMR ( $\text{DMSO-}d_6$ ;  $\delta$  ppm): 160.79, 157.48, 150.70, 148.40, 148.25, 137.33, 136.30, 135.90, 128.90, 128.28, 127.83, 127.66, 125.16, 124.37.

<sup>#</sup>The appearance of NH proton signal at higher ppm (14.08) is due to involvement in intra-molecular H-bonding with pyridine-N in Z form.<sup>6</sup>

#### 4. Crystal structure of ligand $\text{H}_2\text{bpoh}$

The ORTEP diagram of ligand with the atomic numbering scheme is shown (Fig. 1). The molecule displays a E configuration about the  $>\text{C}=\text{N}$  bond.<sup>7</sup> The  $>\text{C}=\text{O}$  and  $>\text{C}=\text{N}$  displays a bond distance of 1.208(5) Å and 1.294(5) Å, respectively which is consistent with a double bond.<sup>8</sup> The N(2)-N(3) bond distance is 1.372(5) Å, which is slightly shorter than the single bond, showing some double bond character. Due to the presence of intra-molecular N(3)-H...N(1) hydrogen bond, Py-C(6)=N(2)-N(3)-C(13)=O(1) skeleton in the ligand is almost planar. The intra-molecular hydrogen bond N(3)-H(3A)...N(1), is formed between N(3)-H(3A) of amido-N atom and the nitrogen of pyridine ring. The torsion angles N(1)-C(5)-C(6)-C(7) [174.6(5)°], O(1)-C(13)-N(3)-N(2) [1.8(8)°], N(1)-C(5)-C(6)-N(2) [-5.7(8)°] and N(3)-N(2)-C(6)-C(7) [179.9(4)°] indicate that O(1)-N(2) and N(1)-N(2) are syn-periplanar to each other but N(1)-C(7) and N(3)-C(7) are anti-periplanar to each other.



## 6. Packing diagram of Mn(II) complex

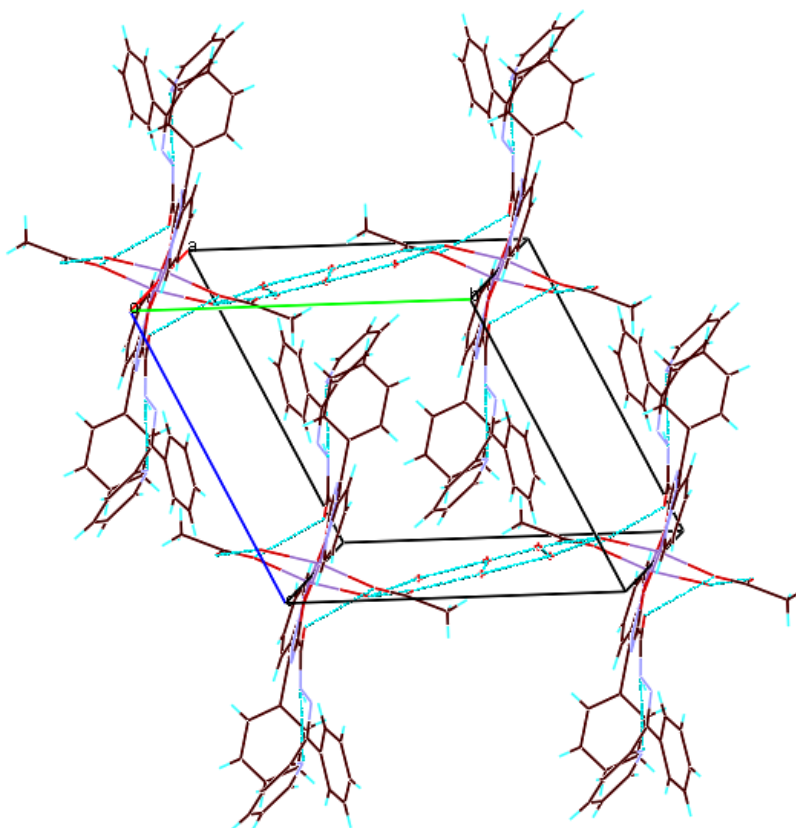

**Fig. S3** Packing diagram of Mn(II) complex

## 7. Inter- and intra-molecular H-bonding in Mn(II) complex

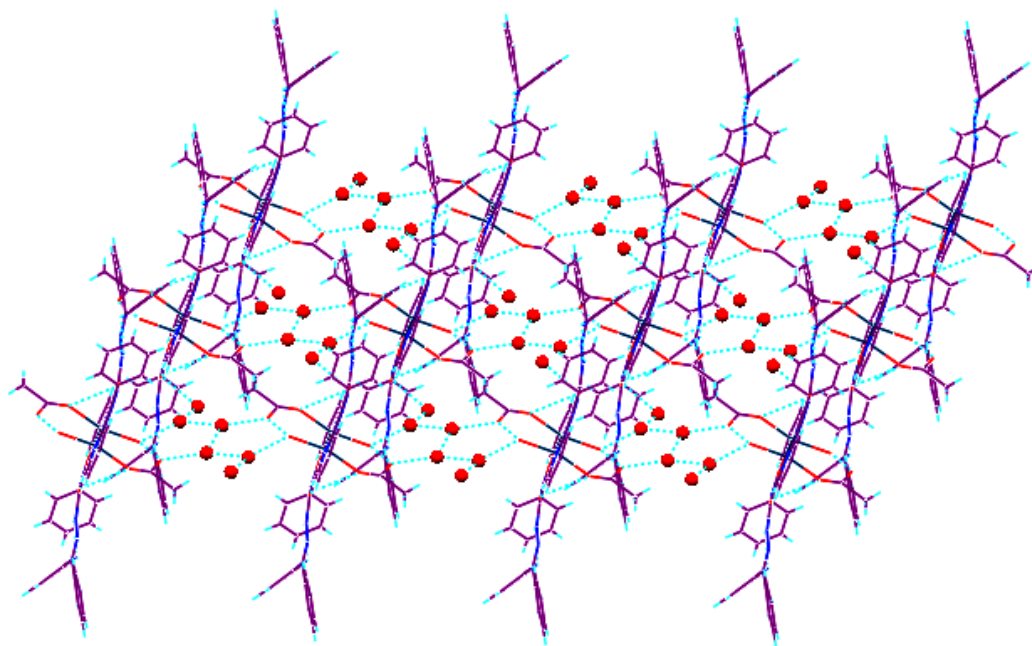

**Fig. S4** Inter- and intra-molecular hydrogen bonding leading to five member water clusters

## 8. Selected crystallographic data for ligand and Mn(II) complex

**Table 1** Crystallographic data of the ligand and complex

|                                        | <b>H<sub>2</sub>bpoH</b>                                      | <b>[Mn(HbpoH)(OAc)(H<sub>2</sub>O)]<sub>2</sub>·6H<sub>2</sub>O</b>             |
|----------------------------------------|---------------------------------------------------------------|---------------------------------------------------------------------------------|
| Empirical Formula                      | C <sub>26</sub> H <sub>20</sub> N <sub>6</sub> O <sub>2</sub> | C <sub>56</sub> H <sub>60</sub> Mn <sub>2</sub> N <sub>12</sub> O <sub>16</sub> |
| Formula weight                         | 448.48                                                        | 1267.04                                                                         |
| Temp, K                                | 293                                                           | 293                                                                             |
| λ (Å)                                  | 0.71073                                                       | 0.71073                                                                         |
| Crystal system                         | Triclinic                                                     | Triclinic                                                                       |
| Space group                            | P-1                                                           | P -1                                                                            |
| a (Å)                                  | 10.000(10)                                                    | 11.6403(9)                                                                      |
| b (Å)                                  | 15.6555(16)                                                   | 12.6172(10)                                                                     |
| c (Å)                                  | 16.5447(16)                                                   | 12.7323(9)                                                                      |
| α (°)                                  | 115.226(10)                                                   | 60.362(2)                                                                       |
| β (°)                                  | 101.302(8)                                                    | 73.137(2)                                                                       |
| γ (°)                                  | 98.774(9)                                                     | 63.765(2)                                                                       |
| V (Å <sup>3</sup> )                    | 2214.9(5)                                                     | 1451.75(19)                                                                     |
| Z                                      | 4                                                             | 1                                                                               |
| D <sub>calc</sub> (g/cm <sup>3</sup> ) | 1.345                                                         | 1.431                                                                           |
| μ (mm <sup>-1</sup> )                  | 0.089                                                         | 0.514                                                                           |
| F(000)                                 | 936                                                           | 642                                                                             |
| Crystal size (mm)                      | 0.24x 0.22x<br>0.20                                           | 0.34x 0.32x 0.30                                                                |
| θ range for data collection (°)        | 2.93 - 29.15                                                  | 3.24 - 27.44                                                                    |
| No. of reflections collected           | 19908                                                         | 14320                                                                           |
| No. of independent reflections         | 11941                                                         | 6561 (0.0568)                                                                   |

|                                                             |                      |                  |
|-------------------------------------------------------------|----------------------|------------------|
| (R <sub>int</sub> )                                         | (0.0821)             |                  |
| Number of                                                   | 11941 / 6 /          |                  |
| data/restraints/parameters                                  | 614                  | 6561/7/393       |
| Goodness-of-fit on F <sup>2</sup>                           | 0.910                | 1.085            |
| R <sub>1</sub> , wR <sub>2</sub> <sup>a,b</sup> [(I>2σ(I))] | 0.0766,<br>0.0809    | 0.0776, 0.2243   |
| R <sub>1</sub> , wR <sub>2</sub> <sup>a,b</sup> (all data)  | 0.3186,<br>0.1391    | 0.1092, 0.2590   |
| Largest difference in peak and<br>hole (e.Å <sup>-3</sup> ) | 0.178 and -<br>0.177 | 1.620 and -0.736 |

---

<sup>a</sup>  $R_1 = \frac{\sum ||F_o| - |F_c||}{\sum |F_o|}$ ; <sup>b</sup>  $R_2 = \frac{[\sum w(|F_o|^2 - |F_c|^2)|^2]}{\sum w|F_o|^2}]^{1/2}$

**Table 2** Selected bond lengths and bond angles

|                         | H <sub>2</sub> bpoH | [Mn(HbpoH)(OAc)(H <sub>2</sub> O)] <sub>2</sub> ·6H <sub>2</sub> O |
|-------------------------|---------------------|--------------------------------------------------------------------|
| <b>Bond Length</b>      |                     |                                                                    |
| O(1)–C(13)              | 1.208(5)            | 1.260(4)                                                           |
| N(3)–C(13)              | 1.352(5)            | 1.310(5)                                                           |
| N(3)–N(2)               | 1.372(5)            | 1.393(5)                                                           |
| N(2)–C(6)               | 1.294(5)            | 1.286(5)                                                           |
| C(5)–C(6)               | 1.497(6)            | 1.480(6)                                                           |
| C(5)–N(1)               | 1.347(6)            | 1.351(4)                                                           |
| N(1)–C(1)               | 1.325(6)            | 1.340(6)                                                           |
| C(6)–C(7)               | 1.474(7)            | 1.496(4)                                                           |
| Mn(1)–O(1)              |                     | 2.209(4)                                                           |
| Mn(1)–O(1) <sup>i</sup> |                     | 2.188(3)                                                           |



|                   |          |          |
|-------------------|----------|----------|
| Mn(1)–O(3)        |          | 2.178(5) |
| Mn(1)–O(5)        |          | 2.225(6) |
| Mn(1)–N(1)        |          | 2.307(4) |
| Mn(1)–N(2)        |          | 2.323(2) |
| <b>Bond Angle</b> |          |          |
| O(1)–C(13)–N(3)   | 127.1(5) | 126.5(4) |
| N(3)–N(2)–C(6)    | 120.1(4) | 119.3(3) |
| C(5)–N(1)–C(1)    | 118.2(5) | 118.2(4) |
| C(13)–N(3)–N(2)   | 118.3(4) | 107.5(3) |
| O(1)–Mn(1)–O(3)   |          | 95.1(1)  |
| O(1)–Mn(1)–O(5)   |          | 86.7(1)  |
| O(1)–Mn(1)–N(2)   |          | 133.2(1) |
| O(1)–Mn(1)–N(1)   |          | 156.8(1) |
| O(1)–Mn(1)–O(1)   |          | 66.6(1)  |
| O(3)–Mn(1)–O(5)   |          | 162.7(2) |
| O(3)–Mn(1)–N(2)   |          | 99.5(1)  |
| O(3)–Mn(1)–N(1)   |          | 84.8(2)  |
| O(3)–Mn(1)–O(1)   |          | 102.2(1) |
| O(5)–Mn(1)–N(2)   |          | 91.7(1)  |
| O(5)–Mn(1)–N(1)   |          | 86.9(2)  |
| O(5)–Mn(1)–O(1)   |          | 94.3(1)  |
| N(2)–Mn(1)–N(1)   |          | 69.2(1)  |
| N(2)–Mn(1)–O(1)   |          | 66.9(1)  |
| N(1)–Mn(1)–O(1)   |          | 136.1(1) |
| Mn(1)–O(1)–Mn(1)  |          | 113.4(1) |

## 9. Catalytic activity test

**(a) Procedure for transamidation**  $[\text{Mn}(\text{Hbpoh})(\text{OAc})(\text{H}_2\text{O})]_2 \cdot 6\text{H}_2\text{O}$  (5 mol%) was added to a Schlenk flask, equipped with a rubber septum and teflon-coated stir bar, containing carboxamide (10 mmol) and amine (10 mmol). The resulting mixture was vigorously stirred at 120 °C for 24 h. The progress of the reaction was monitored through TLC. After completion of the reaction, the resulting mixture was cooled to room temperature; ethyl acetate (20 mL) was added and filtered through a porous plug. The filtrate was concentrated using rotary vacuum evaporator. The crude product thus obtained was purified by column chromatography using a mixture of ethyl acetate/n-hexane as an eluent. All the products have been full characterized on the basis of their physical and spectral properties.

## 10. References

1. R. L. Dutta and A. Syamal, *Elements of Magnetochemistry*, Affiliated East-West Press Pvt. Ltd., New Delhi, **1993**.
2. G. M. Sheldrick, *Acta Crystallogr. Sect. A*, 1990, **46**, 467–473.
3. G. M. Sheldrick, *SHELXL-97, Program for Crystal Structure Refinement*, University of Gottingen, Germany, **1997**.
4. I. J. Bruno, J. C. Cole, P. R. Edgington, M. Kessler, C. F. Macrae, P. McCabe, J. Pearson and R. Taylor, *Acta Crystallogr. Sect. B*, 2002, **58**, 389–397.
5. L. J. Farrugia, *J. Appl. Crystallogr.*, 1997, **30**, 565–566.
6. A. A. R. Despaigne, J. G. Da Silva, A. C. M. do Carmo, O. E. Piro, E. E. Castellano and H. Beraldo, *Inorg. Chim. Acta.*, 2009, **362**, 2117-2122.
7. D. P. Singh, D. S. Raghuvanshi, K. N. Singh and V. P. Singh, *J. Mol. Catal. A: Chem.*, 2013, **379**, 21–29.
8. G. J. Xiao and C. Wei, *Acta Cryst.*, 2009, **E65**, o585.

C:\Divya P. Singh\BPOOH\_1H.a1s  
 BPOOH\_1H Mr.Divya P. Singh

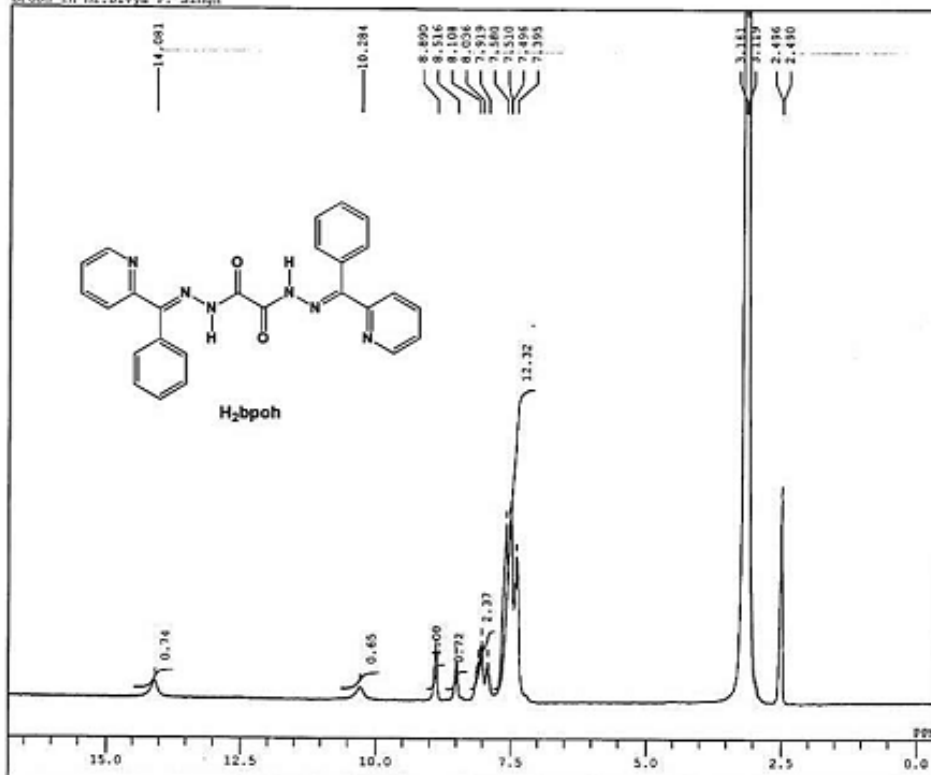

JEOL AL300 FTMR  
 CHEMISTRY DEPARTMENT  
 Banaras Hindu University,  
 VARANASI-221005

Operator : Nagendra Kumar  
 Shishir Singh

DFILE C:\Divya P. Singh\BPOOH\_1H  
 COMNT BPOOH\_1H Mr.Divya P. S.  
 DATIM Thu Dec 20 17:08:36 2012  
 ORNUC 1H  
 EXMOD NONE  
 ORFREQ 300.40 MHz  
 ORSET 130.00 MHz  
 ORFIN 1150.0 Hz  
 POINT 32768  
 FREQO 9505.7 Hz  
 SCANS 46  
 ACQTH 3.447 sec  
 PD 1.547 sec  
 PW1 5.2 us  
 IRNUC 1H  
 CTEMP 80.2 c  
 SLVNT DMSO  
 EXREF 2.49 ppm  
 BF 1.20 Hz  
 RGAIN 15

C:\WINNMR98\Data\OBP\_1H10CH\_54.a1s  
 OBP\_1H Mr.Divya P. Singh

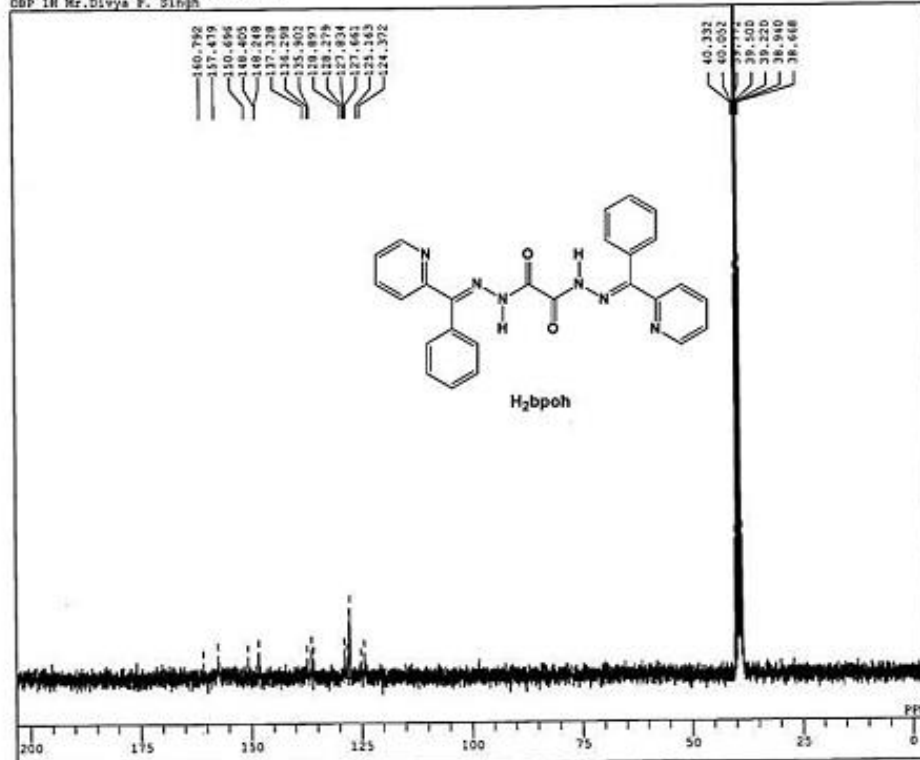

JEOL AL300 FTMR  
 CHEMISTRY DEPARTMENT  
 Banaras Hindu University,  
 VARANASI-221005

Operator : Nagendra Kumar  
 Shishir Singh

DFILE C:\WINNMR98\Data\OBP\_1H  
 COMNT OBP\_1H Mr.Divya P. Singh  
 DATIM Tue Aug 20 03:31:26 2012  
 ORNUC 13C  
 EXMOD NONE  
 ORFREQ 75.45 MHz  
 ORSET 124.00 MHz  
 ORFIN 1840.0 Hz  
 POINT 32768  
 FREQO 20469.1 Hz  
 SCANS 2000  
 ACQTH 1.406 sec  
 PD 1.394 sec  
 PW1 5.9 us  
 IRNUC 13C  
 CTEMP 130.1 c  
 SLVNT DMSO  
 EXREF 39.50 ppm  
 BF 1.20 Hz  
 RGAIN 25
